# Confocal Laser Scanning Microscopy, a New *In Vivo* Diagnostic Tool for Schistosomiasis

Carlos Fritzsche<sup>1\*</sup>, Oliver Stachs<sup>2,3</sup>, Martha Charlotte Holtfreter<sup>1</sup>, Constanze Nohr-Łuczak<sup>3</sup>, Rudolf Friedrich Guthoff<sup>2</sup>, Emil Christian Reisinger<sup>1</sup>

**1** Division of Tropical Medicine and Infectious Diseases, Department of Internal Medicine, University of Rostock, Rostock, Germany, **2** Department of Ophthalmology, University of Rostock, Rostock, Germany, **3** Department of Urology, University of Rostock, Rostock, Germany

## Abstract

**Background:** The gold standard for the diagnosis of schistosomiasis is the detection of the parasite's characteristic eggs in urine, stool, or rectal and bladder biopsy specimens. Direct detection of eggs is difficult and not always possible in patients with low egg-shedding rates. Confocal laser scanning microscopy (CLSM) permits non-invasive cell imaging *in vivo* and is an established way of obtaining high-resolution images and 3-dimensional reconstructions. Recently, CLSM was shown to be a suitable method to visualize *Schistosoma mansoni* eggs within the mucosa of dissected mouse gut. In this case, we evaluated the suitability of CLSM to detect eggs of *Schistosoma haematobium* in a patient with urinary schistosomiasis and low egg-shedding rates.

**Methodology/Principal Findings:** The confocal laser scanning microscope used in this study was based on a scanning laser system for imaging the retina of a living eye, the Heidelberg Retina Tomograph II, in combination with a lens system (image modality). Standard light cystoscopy was performed using a rigid cystoscope under general anaesthesia. The CLSM endoscope was then passed through the working channel of the rigid cystoscope. The mucosal tissue of the bladder was scanned using CLSM. *Schistosoma haematobium* eggs appeared as bright structures, with the characteristic egg shape and typical terminal spine.

**Conclusion/Significance:** We were able to detect schistosomal eggs in the urothelium of a patient with urinary schistosomiasis. Thus, CLSM may be a suitable tool for the diagnosis of schistosomiasis in humans, especially in cases where standard diagnostic tools are not suitable.

**Citation:** Fritzsche C, Stachs O, Holtfreter MC, Nohr-Łuczak C, Guthoff RF, et al. (2012) Confocal Laser Scanning Microscopy, a New *In Vivo* Diagnostic Tool for Schistosomiasis. PLoS ONE 7(4): e34869. doi:10.1371/journal.pone.0034869

**Editor:** Jason Mulvenna, James Cook University, Australia

**Received:** December 21, 2011; **Accepted:** March 6, 2012; **Published:** April 17, 2012

**Copyright:** © 2012 Fritzsche et al. This is an open-access article distributed under the terms of the Creative Commons Attribution License, which permits unrestricted use, distribution, and reproduction in any medium, provided the original author and source are credited.

**Funding:** The authors have no support or funding to report.

**Competing Interests:** The authors have declared that no competing interests exist.

\* E-mail: carlos.fritzsche@med.uni-rostock.de

These authors contributed equally to this work.

## Introduction

Schistosomiasis, a major parasitic disease infecting over 200 million people worldwide [1], is associated with considerable morbidity and mortality in the developing world [2]. The gold standard for the diagnosis of schistosomiasis is the detection of the parasite's characteristic eggs in urine, stool, or rectal and bladder biopsy specimens. Direct detection of eggs is difficult and not always possible in patients with low egg-shedding rates. Serological tests such as enzyme-linked immunosorbent assays, immunofluorescence assays and indirect haemagglutination assays are used widely to detect antibodies against worm or soluble egg antigens. However, these assays are unable to differentiate between persistent and inactive infection and fail to discriminate between parasite species [3]. While polymerase chain reaction methods can detect schistosomal egg DNA in stool and urine, and parasite DNA in serum samples, none of the published PCR methods has so far been evaluated for use in routine diagnosis.

The detection of viable eggs indicates an active infection requiring drug treatment. The viability of eggs collected from

stool, urine and biopsy specimens can be tested using the miracidium hatching procedure in which eggs are incubated in fresh water to see whether larvae hatch. However, this procedure is time-consuming and has a low sensitivity [4].

Confocal laser scanning microscopy (CLSM) permits non-invasive cell imaging *in vivo* and is an established way of obtaining high-resolution images and 3-dimensional reconstructions [5]. CLSM has recently been introduced as a diagnostic tool in ophthalmology, urology, dermatology, gastroenterology and oncology [6,7,8,9,10,11].

Recently, we were able to demonstrate that CLSM is a suitable method to visualize viable *Schistosoma mansoni* eggs within the mucosa of dissected mouse gut [12].

In the case in hand we used CLSM in combination with standard cystoscopy to detect *Schistosoma haematobium* (*S. haematobium*) eggs in the urothelium of a patient with urinary schistosomiasis.

## Materials and Methods

### Imaging and Confocal Laser Scanning Microscopy

The CLSM device (wavelength 670 nm, image size 348×384 pixels, 30 frames per second) used in this study was based on a scanning laser system for imaging the retina of a living eye, the Heidelberg Retina Tomograph II (HRT II, Heidelberg Engineering GmbH, Germany), in combination with a lens system (image modality). The lens system has a field of view of 400×400 μm and was coupled to the mucosal tissue. The penetration depth of the optical system is about 100 μm, limited by signal-to-noise ratio and background intensity.

Image modality was based on the HRT II and a rigid endoscope (length 23 cm, diameter 5 mm) with an integrated rod lens system (Storz, Tuttlingen, Germany) as described by Farahati [10]. Coupled to the HRT II, the endoscope attains a spatial resolution of 5 μm in the axial dimension and 1–2 μm in the lateral dimension.

Standard light cystoscopy was performed using a rigid cystoscope under general anaesthesia. The CLSM endoscope was then passed through the working channel of the rigid cystoscope. Endomicroscopy was recorded as a series of video sequences at a frame rate of 30 frames per second.

### Ethics statement

The patient in this manuscript has given written informed consent to publication of their case details. This study was specifically approved by the local Ethics Committee of the University of Rostock, Germany (registry number A 2011 127, “Ethikkommission an der Medizinischen Fakultät der Universität Rostock”).

### Results

A 52-year-old male patient from Mozambique presented with dysuria due to urinary schistosomiasis which was first diagnosed two years ago by the histological detection of *S. haematobium* eggs in urinary bladder biopsies. Although treatment with praziquantel 40 mg/KG was administered twice within two years, histological examinations repeatedly revealed viable worm eggs in the urinary bladder biopsies.

When he presented to our department, urine and stool specimens were negative for worm eggs on multiple occasions and schistosoma antibodies were positive in the ELISA. Cystoscopy revealed the sandy patches and hyperaemic mucosa typical of schistosomiasis. The mucosal tissue of the bladder was scanned using CLSM. *S. haematobium* eggs appeared as bright structures (figure 1a), and after focus adjustment the characteristic egg shape and typical terminal spine became visible (figure 1b). However, miracidia were not observed within the egg shells.

After cystoscopy, repeated examination of the urine sediment revealed *S. haematobium* eggs which the miracidium hatching assay showed to be non-viable. Confocal laser scanning microscopy of the rectal mucosa and multiple stool examinations were negative for worm eggs.

### Discussion

This is the first case to document the direct detection of schistosomal eggs *in vivo* using CLSM. We found that CLSM is an appropriate method for visualising schistosomal eggs within the urothelium.

When stool and urine specimens are negative, biopsy specimens from the rectum or the urinary bladder can be turned into tissue crush preparations or stained paraffin sections and examined for the presence and viability of trapped eggs. However, biopsies are invasive, the examination area is limited and the specimens embedded in paraffin or used in miracidium hatching assays are evaluable only in specialised laboratories. Furthermore, the hatching assay is time-consuming and its sensitivity is low, as immature eggs not yet containing miracidia cannot be distinguished from dead eggs [4].

It was already demonstrated, that CLSM is not only a suitable method to detect schistosomal eggs in dissected mouse gut, but also to demonstrate their viability [12].

Our study aimed to test the suitability of CLSM as a method of detecting schistosomal eggs *in vivo*. CLSM allows a larger area to be scanned for eggs than does a biopsy, the method is non-invasive and the results are available immediately. Although the costs for the acquisition of the CLSM device might be high, further costs due to examination of the biopsies by pathologists, diagnostic viability assessments by specialised laboratories and costs of involved personnel could be saved.

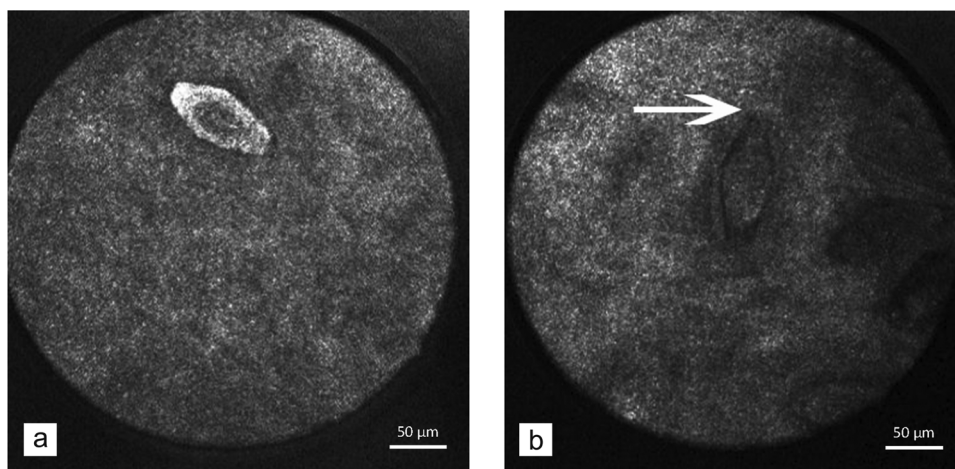

**Figure 1. Confocal laser scanning microscopy of the urinary bladder.** *In vivo* confocal laser scanning microscopy of the bladder showing eggs of *Schistosoma haematobium* (figure 1a and 1b) with their typical terminal spine (arrow) (figure 1b). doi:10.1371/journal.pone.0034869.g001

However, the CLSM device in our study has several limitations. In order to allow a greater depth of penetration into the mucosal tissue, our CLSM device has a fixed wavelength of 670 nm. Therefore, the image is a reflectance image. Lower excitation wavelength would lead to shorter penetration depths, but possibly lead to a better autofluorescence signal of the schistosomal eggs, improving the quality of the images. A possible useful technique for this case could be multiphoton endomicroscopy [13,14]. Because the field of view is so small, image acquisition is very sensitive to motion introduced by the investigator. Problems in manipulating the endoscope with the rigid cystoscope make it difficult to establish the required contact with the urothelium in some areas of the bladder, such as the anterior wall, and imaging the entire bladder is not practical using an endoscope with a 5 mm diameter and a 400  $\mu\text{m}$  field of view. The theoretical focus distance from the last lens of the endoscope is about 300  $\mu\text{m}$ , but in practice it depends from contact conditions, contact pressure, and refractive index of the tissue.

## References

- Loebermann M, Sombetzki M, Langner C, Fuchsichler A, Gumhold J, et al. (2009) Imbalance of pro- and antifibrogenic genes and bile duct injury in murine *Schistosoma mansoni* infection-induced liver fibrosis. *Trop Med Int Health* 14: 1418–1425.
- Edungbola LD, Asaolu SO, Omonisi MK, Aiyedun BA (1988) *Schistosoma haematobium* infection among schoolchildren in the Babana district, Kwara State, Nigeria. *Afr J Med Med Sci* 17: 187–193.
- Doenhoff MJ, Chiodini PL, Hamilton JV (2004) Specific and sensitive diagnosis of schistosome infection: can it be done with antibodies? *Trends Parasitol* 20: 35–39.
- Giboda M, Zdarska Z (1994) Alkaline phosphatase as marker of *Schistosoma mansoni* egg viability. *Folia Parasitol (Praha)* 41: 55–58.
- Dailey ME, Manders E, Soll DR, Terasaki M (1995) Confocal microscopy of the living cell. In: Pawley JB, ed. *Handbook of Biological Confocal Microscopy*. New York: Plenum Press. pp 381–398.
- Sonn GA, Jones SN, Tarin TV, Du CB, Mach KE, et al. (2009) Optical biopsy of human bladder neoplasia with in vivo confocal laser endomicroscopy. *J Urol* 182: 1299–1305.
- Gerger A, Hofmann-Wellenhof R, Samonigg H, Smolle J (2009) In vivo confocal laser scanning microscopy in the diagnosis of melanocytic skin tumours. *Br J Dermatol* 160: 475–481.
- Guthoff RF, Zhivov A, Stachs O (2009) In vivo confocal microscopy, an inner vision of the cornea – a major review. *Clin Experiment Ophthalmol* 37: 100–117.
- Nohr-Westphal C, Stachs O, Kroger M, Kram W, Guthoff R, et al. (2009) [Confocal laser scanning microscopy of the urothelium]. *Urologe A* 48: 1025–1026, 1028, 1030–1021.
- Farahati B, Stachs O, Prall F, Stave J, Guthoff R, et al. (2010) Rigid confocal endoscopy for in vivo imaging of experimental oral squamous intra-epithelial lesions. *J Oral Pathol Med* 39: 318–327.
- Zhang WH, Zhu SN, Lu SL, Huang YL, Zhao P (2000) Three-dimensional image of hepatocellular carcinoma under confocal laser scanning microscope. *World J Gastroenterol* 6: 344–347.
- Holtfreter MC, Stachs O, Reinhard M, Loebermann M, Guthoff RF, et al. (2011) Confocal Laser Scanning Microscopy for Detection of *Schistosoma mansoni* in the Gut of Mice. *PLoS ONE* 6: e18799.
- Jung JC, Schnitzer MJ (2003) Multiphoton endoscopy. *Opt Lett* 28: 902–904.
- Bar-Joseph H, Ben-Aharon I, Tzabari M, Tsarfaty G, Stemmer SM, et al. (2011) In vivo bioimaging as a novel strategy to detect doxorubicin-induced damage to gonadal blood vessels. *PLoS One* 6: e23492.
- Goetz M, Kiesslich R (2010) Advances of endomicroscopy for gastrointestinal physiology and diseases. *Am J Physiol Gastrointest Liver Physiol* 298: G797–806.

## Author Contributions

Conceived and designed the experiments: CF OS MH CNL RFG ECR. Performed the experiments: OS CNL. Analyzed the data: CF MH. Contributed reagents/materials/analysis tools: OS CNL RFG. Wrote the paper: CF.
